# Supplementary material for: Multicomponent intervention versus usual care for management of hypertension in rural Bangladesh, Pakistan and Sri Lanka: study protocol for a cluster randomized controlled trial
Source: PubMed Central journal article supplement (PMC5469065; doi:10.1186/s13063-017-2018-0), 2017-06-12
Supplement: 13063_2017_2018_MOESM2_ESM.pdf [file 13063_2017_2018_MOESM2_ESM.pdf]

## Additional file 2: Summary of intervention trainings

| Healthcare Provider                                                                                  | Training Components                                                                                                                                                                                                                                                                                                                                                                                                                                                                                                                                                                        | Duration                                                                                                   | Trainer                                                                                |
|------------------------------------------------------------------------------------------------------|--------------------------------------------------------------------------------------------------------------------------------------------------------------------------------------------------------------------------------------------------------------------------------------------------------------------------------------------------------------------------------------------------------------------------------------------------------------------------------------------------------------------------------------------------------------------------------------------|------------------------------------------------------------------------------------------------------------|----------------------------------------------------------------------------------------|
| <b>Community health workers (CHW)</b>                                                                | <ol style="list-style-type: none"> <li>1. Home Health Education (HHE)</li> <li>2. Blood pressure measurement and interpretation and stepped-up referral to GP included in training on;</li> <li>3. CHW BP Monitoring and HHE Checklist</li> <li>4. Referral Checklist</li> <li>5. Standardized lifestyle messages for better control of blood pressure</li> <li>6. Behaviour change communication strategies</li> </ol>                                                                                                                                                                    | 5 days<br>1 day follow-up refresher session will be held after 2 months and then <b>Annual re-training</b> | Nutritionist                                                                           |
| <b>Research staff</b>                                                                                | <ol style="list-style-type: none"> <li>1. Proper method of measuring and interpreting blood pressure</li> <li>2. Identification of urgent cases and standard procedure for referring to higher levels of care</li> <li>3. Proper method of taking anthropometric measurements</li> <li>4. Procedure for obtaining and recording informed consent</li> <li>5. Interview and data collection techniques</li> <li>6. Standardized techniques of editing data collection forms</li> <li>7. Realize and record adverse events during the follow up visits and report to the site PIs</li> </ol> | 1 day re-training will be during 4 hour session after 3 months and then <b>Annual re-training</b>          | Study coordinators                                                                     |
| <b>Providers (nurses, pharmacists/ dispensers) in public, and GPs in public and private clinics)</b> | <p><i>Hypertension Management Manual for Clinic Providers consists of training on:</i></p> <ol style="list-style-type: none"> <li>1. BP measurement using digital Omron device</li> <li>2. Lifestyle advice</li> <li>3. Anti-hypertensive treatment algorithm per protocol</li> <li>4. Assessing risk factors and comorbidities and risk stratification, and initiation of lipid lowering therapy</li> <li>5. Clarity on mechanism of physician oversight</li> <li>6. When to refer individuals to the next level of care</li> <li>7. Maintain GP Management Checklist</li> </ol>          | 1 day re-training will be during 4 hour session after 3 months and then <b>Annual re-training</b>          | Family Physician or Hypertension Specialist e.g. Cardiologist, Nephrologist, Internist |
