# Supplementary material for: Multicomponent intervention versus usual care for management of hypertension in rural Bangladesh, Pakistan and Sri Lanka: study protocol for a cluster randomized controlled trial
Source: PubMed Central journal article supplement (PMC5469065; doi:10.1186/s13063-017-2018-0), 2017-06-12
Supplement: 13063_2017_2018_MOESM5_ESM.pdf [file 13063_2017_2018_MOESM5_ESM.pdf]

**Primary Care Strategies to Reduce High Blood Pressure: A Cluster Randomized Trial in rural Bangladesh, Pakistan and Sri Lanka**

**GP REFERRAL CHECKLIST**

|   |                                                                   |                                                      |   |                                      |  |
|---|-------------------------------------------------------------------|------------------------------------------------------|---|--------------------------------------|--|
| 1 | Date of interview (dd/mm/yyyy)                                    |                                                      | 6 | Participant's name                   |  |
| 2 | Date of birth (dd/mm/yyyy)                                        |                                                      | 7 | Community Household #                |  |
|   | Age at last birthday                                              |                                                      | 8 | Visit Type (eg. BL, 3m, 6m, 9m, ...) |  |
| 3 | Number Assigned by CHW                                            |                                                      |   |                                      |  |
| 4 | Name and Signature of CHW                                         | Name:<br><br>Signature:                              |   |                                      |  |
| 5 | Name of healthcare provider and clinic/hospital being referred to | Name of healthcare provider:<br><br>Clinic/hospital: |   |                                      |  |

Is the participant any of the following: (Tick ✓ all check boxes that apply)

- 1. This patient was found to have persistently elevated blood pressure (**systolic ≥ 160 mm Hg or diastolic ≥ 100 mm Hg**) for **2 separate readings**.
- 2. This patient is currently having shortness of breath, chest pain or other serious medical condition
- 3. Specify condition/symptoms: \_\_\_\_\_

4. Enter BP readings below:

| BP Readings                 | 1 <sup>st</sup> Reading | 2 <sup>nd</sup> Reading |
|-----------------------------|-------------------------|-------------------------|
| Time of BP Reading (hh:mm): |                         |                         |
| Systolic BP (SBP) (mm Hg):  |                         |                         |
| Diastolic BP (DBP) (mm Hg): |                         |                         |
| PULSE/min:                  |                         |                         |
