# Supplementary material for: Multicomponent intervention versus usual care for management of hypertension in rural Bangladesh, Pakistan and Sri Lanka: study protocol for a cluster randomized controlled trial
Source: Trials. 2017 Jun 12;18:272. doi: 10.1186/s13063-017-2018-0 (PMC5469065; doi:10.1186/s13063-017-2018-0)
Supplement: Supplementary file 3 — CHW checklist. (PDF 175 kb) [file 13063_2017_2018_MOESM3_ESM.pdf]

## Primary Care Strategies to Reduce High Blood Pressure: A Cluster Randomized Trial in rural Bangladesh, Pakistan and Sri Lanka

### CHW BP MONITORING and HOME HEALTH EDUCATION CHECKLIST

|   |                                |  |    |                                                             |  |
|---|--------------------------------|--|----|-------------------------------------------------------------|--|
| 1 | Date of interview (dd/mm/yyyy) |  | 8  | Number Assigned by CHW                                      |  |
| 2 | Country                        |  | 9  | Participant's name                                          |  |
| 3 | Cluster number                 |  | 10 | Gender                                                      |  |
| 4 | Structure number               |  | 11 | Visit Type (e.g. BL, 3m, 6m, 9m, ...)                       |  |
| 5 | Community household number     |  | 12 | <b>Study ID (if applicable):</b><br>_ _ - _ - _ - _ - _ - _ |  |
| 6 | Family number                  |  |    |                                                             |  |
| 7 | Name of CHW                    |  |    |                                                             |  |

**Instructions:** Please tick (✓) the box that corresponds to your response, indicate text answers on allotted space where applicable.

|                                                                                                       |                                                                |
|-------------------------------------------------------------------------------------------------------|----------------------------------------------------------------|
| <b>(1) A. BP measurement Preparation:</b>                                                             |                                                                |
| a. Did the participant smoke in the past 30 minutes?                                                  | <input type="checkbox"/> 1. Yes <input type="checkbox"/> 2. No |
| b. Did the participant have any caffeinated drink (e.g. coffee, tea) in the past 30 minutes?          | <input type="checkbox"/> 1. Yes <input type="checkbox"/> 2. No |
| c. Has the participant rested for at least 5 minutes prior to BP measurement?                         | <input type="checkbox"/> 1. Yes <input type="checkbox"/> 2. No |
| <b>Proceed to measure BP only if responses to questions a, b are "No" and for question c is "Yes"</b> |                                                                |

|                                                                                                                                                                                                                                                                                                                                                                                                                                                                                                                                                                                                                                                  |                                                                                                                                                                                                                                                                                                                                                      |                                |             |                                |            |
|--------------------------------------------------------------------------------------------------------------------------------------------------------------------------------------------------------------------------------------------------------------------------------------------------------------------------------------------------------------------------------------------------------------------------------------------------------------------------------------------------------------------------------------------------------------------------------------------------------------------------------------------------|------------------------------------------------------------------------------------------------------------------------------------------------------------------------------------------------------------------------------------------------------------------------------------------------------------------------------------------------------|--------------------------------|-------------|--------------------------------|------------|
| <b>(1) B. Cuff selection:</b>                                                                                                                                                                                                                                                                                                                                                                                                                                                                                                                                                                                                                    |                                                                                                                                                                                                                                                                                                                                                      |                                |             |                                |            |
| <p>Using the <b>medium-sized cuff</b> <u>estimate</u> if the</p> <p>- bladder covers <math>\geq 80\%</math> of arm circumference:   <input type="checkbox"/> 1. Yes   <input type="checkbox"/> 2. No</p> <p style="text-align: center;">OR</p> <p>- Cuff width <math>\geq 40\%</math> of arm circumference:   <input type="checkbox"/> 1. Yes   <input type="checkbox"/> 2. No</p> <p><i>If either of above "Yes", proceed to measure BP.</i></p> <p><b><i>If both of above "No", measure arm circumference:</i></b> _____ cm</p> <p><b>Size of cuff used:</b></p> <p><input type="checkbox"/> 1. Medium   <input type="checkbox"/> 2. Large</p> | <p><b>Arm Circumference:</b></p> <table border="1" style="margin: auto; border-collapse: collapse;"> <tr> <td style="padding: 5px;"><b><math>\leq 32</math> cm</b></td> <td style="padding: 5px;">Medium Cuff</td> </tr> <tr> <td style="padding: 5px;"><b><math>&gt; 32</math> cm</b></td> <td style="padding: 5px;">Large Cuff</td> </tr> </table> | <b><math>\leq 32</math> cm</b> | Medium Cuff | <b><math>&gt; 32</math> cm</b> | Large Cuff |
| <b><math>\leq 32</math> cm</b>                                                                                                                                                                                                                                                                                                                                                                                                                                                                                                                                                                                                                   | Medium Cuff                                                                                                                                                                                                                                                                                                                                          |                                |             |                                |            |
| <b><math>&gt; 32</math> cm</b>                                                                                                                                                                                                                                                                                                                                                                                                                                                                                                                                                                                                                   | Large Cuff                                                                                                                                                                                                                                                                                                                                           |                                |             |                                |            |

|                                                                                                        |                               |                               |
|--------------------------------------------------------------------------------------------------------|-------------------------------|-------------------------------|
| <b>(1) C. BP measurement:</b>                                                                          |                               |                               |
| <b><i>Ensure 1<sup>st</sup> and 2<sup>nd</sup> reading taken at least 3 minutes apart.</i></b>         |                               |                               |
| <b>BP Readings</b>                                                                                     | <b>1<sup>st</sup> Reading</b> | <b>2<sup>nd</sup> Reading</b> |
| Time of BP Reading (hh:mm):                                                                            |                               |                               |
| Systolic BP (SBP) (mm Hg):                                                                             |                               |                               |
| Diastolic BP (DBP) (mm Hg):                                                                            |                               |                               |
| PULSE/min:                                                                                             |                               |                               |
| Are <b>both</b> BP readings equal to or more than <b>(systolic 160 mm Hg or diastolic 100 mm Hg)</b> ? |                               |                               |
| <input type="checkbox"/> 1. Yes <input type="checkbox"/> 2. No                                         |                               |                               |

**(2)** Has the participant consulted with a clinic healthcare provider since the last CHW visit?

☐ 1. Yes → Advice to follow-up with a clinic provider for 6-8 weeks later

☐ 2. No → Advice to follow-up with a clinic provider for initiation of treatment **AND** flag for CHW Supervisor visit

**CHW Supervisor Details**

Name: \_\_\_\_\_

Position: \_\_\_\_\_

Date Notified (dd/mm/yyyy): \_\_\_\_\_

Method of Notification(e.g. phone, letter, personally): \_\_\_\_\_

**(3)** Is the participant currently taking any anti-hypertensive medication?    ☐ 1. Yes      ☐ 2. No

If **YES**, write down the details of the medication?

**Generic Name:** \_\_\_\_\_ **Dosage:** \_\_\_\_\_ mg/tab

**Frequency:** ☐ Once daily    ☐ 2 times/day    ☐ 3 times/day    ☐ Other: specify \_\_\_\_\_

**(4)** HHE Session details

Date (dd/mm/yyyy): \_\_\_\_\_

Time Started (hh:mm): \_\_\_\_\_ Time Ended (hh:mm): \_\_\_\_\_

Number of participants during HHE: \_\_\_\_\_

Number of HHE Participants with elevated BP: \_\_\_\_\_

☐ 1. Advised on nutrition (↓Foods high on saturated fats, ↓Salt intake, ↑Fruit and vegetables)  
☐ 2. Advised on maintaining ideal body weight  
☐ 3. Advised on physical activity  
☐ 4. Advised on smoking cessation  
☐ 5. Advised on adherence to high blood pressure medications  
☐ 6. Advised on stress management  
☐ 8. Other: \_\_\_\_\_

(5) Any action taken during this home visit? ☐ 1. Yes ☐ 2. No (→ END)

If **YES**, what are they? (Tick ✓ all check boxes that apply)

- ☐ 1. Advised to proceed to referral hospital (If SBP **180 mm Hg or more**, DBP **120 mm Hg or more**, acute conditions: **chest pain, shortness of breath, or any other serious illness that the CHW deems as requiring urgent referral to a hospital (specify)**):

\_\_\_\_\_

- ☐ 2. Provided information about the participant to the referral hospital (list details of referral):

Referral Hospital: \_\_\_\_\_

Name of Healthcare Provider (if contacted): \_\_\_\_\_

Designation of Healthcare Provider (if contacted): \_\_\_\_\_

Manner Contacted: ☐ 1. Call ☐ 2. Personally ☐ 8. Others (specify) \_\_\_\_\_

- ☐ 3. Advised to consult/follow-up with a trained General Practitioner

**[IN INTERVENTION CLUSTERS ONLY]**
