# Supplementary material for: Multicomponent intervention versus usual care for management of hypertension in rural Bangladesh, Pakistan and Sri Lanka: study protocol for a cluster randomized controlled trial
Source: Trials. 2017 Jun 12;18:272. doi: 10.1186/s13063-017-2018-0 (PMC5469065; doi:10.1186/s13063-017-2018-0)
Supplement: Supplementary file 4 — GP management checklist. (PDF 145 kb) [file 13063_2017_2018_MOESM4_ESM.pdf]

## Primary Care Strategies to Reduce High Blood Pressure: A Cluster Randomized Trial in rural Bangladesh, Pakistan and Sri Lanka

### GP MANAGEMENT CHECKLIST

|                                        |                                                                               |                                      |    |                                      |  |
|----------------------------------------|-------------------------------------------------------------------------------|--------------------------------------|----|--------------------------------------|--|
| 1                                      | Date of diagnosis (dd/mm/yyyy)                                                |                                      | 6  | Participant's name                   |  |
| 2                                      | Date of birth (dd/mm/yyyy)                                                    |                                      | 7  | Community Household #                |  |
|                                        | Age at last birthday                                                          |                                      | 8  | Name of provider                     |  |
| 3                                      | Name of CHW                                                                   |                                      | 9  | Designation of provider              |  |
| 4                                      | Blood pressure as indicated in the referral checklist (average of 2 readings) | SBP: _____ mm Hg<br>DBP: _____ mm Hg | 10 | Clinic Address                       |  |
| 5                                      | Number Assigned by CHW                                                        |                                      | 11 | Visit Type (eg. BL, 3m, 6m, 9m, ...) |  |
| Study ID (if any): __ - __ - ____ - __ |                                                                               |                                      |    |                                      |  |

#### (1) Details of BP Reading at the current clinic visit:

| BP Readings                                                                                                                                                                                                                                                                     | 1 <sup>st</sup> Reading | 2 <sup>nd</sup> Reading |
|---------------------------------------------------------------------------------------------------------------------------------------------------------------------------------------------------------------------------------------------------------------------------------|-------------------------|-------------------------|
| Time of BP Reading (hh:mm):                                                                                                                                                                                                                                                     |                         |                         |
| Systolic BP (mm Hg):                                                                                                                                                                                                                                                            |                         |                         |
| Diastolic BP (mm Hg):                                                                                                                                                                                                                                                           |                         |                         |
| Pulse (beats per minute):                                                                                                                                                                                                                                                       |                         |                         |
| <p>Is the current <b>systolic BP below 140 mm Hg and diastolic BP below 90 mm Hg</b> (Treatment Target) for persons aged &lt;80 years?</p> <p><input type="checkbox"/> 1. Yes</p> <p><input type="checkbox"/> 2. No → <i>manage hypertension as per treatment algorithm</i></p> |                         |                         |

**(2)** Is the patient currently on an anti-hypertensive medication?

☐ 1. Yes→Indicate details below

☐ 2. No→ Item **#3**

| No. | Generic Name | Dosage       | Frequency<br>(# of times taken<br>per day) | Medication Status                                                                                                                     |
|-----|--------------|--------------|--------------------------------------------|---------------------------------------------------------------------------------------------------------------------------------------|
| 1   | _____        | _____ mg/tab |                                            | <input type="checkbox"/> 1. Newly started<br><input type="checkbox"/> 2. Dose titrated<br><input type="checkbox"/> 3. Dose maintained |
| 2   | _____        | _____ mg/tab |                                            | <input type="checkbox"/> 1. Newly started<br><input type="checkbox"/> 2. Dose titrated<br><input type="checkbox"/> 3. Dose maintained |
| 3   | _____        | _____ mg/tab |                                            | <input type="checkbox"/> 1. Newly started<br><input type="checkbox"/> 2. Dose titrated<br><input type="checkbox"/> 3. Dose maintained |

**(3)** Does the patient have any of the following high CVD risk factors? *(Tick all check boxes that apply)*

- ☐ 1. Age  $\geq$  55 years and SBP  $\geq$  160 mm Hg
- ☐ 2. Diabetes Mellitus
- ☐ 3. History of heart disease
- ☐ 4. History of stroke
- ☐ 5. Current smoker

Prescribe **statin** if any of the above factors is present.

| Name of statin prescribed | Dose of statin prescribed |
|---------------------------|---------------------------|
| _____                     | _____                     |

**(4)** Any action taken during this follow-up clinic visit?☐ 1. YesIf **YES**, what are the action(s) taken? *(Tick all check boxes that apply)*☐ Advice on lifestyle modification strengthened☐ Advice on medication adherence strengthened☐ Anti-hypertensive medication prescribed☐ Statin prescribed☐ Other: \_\_\_\_\_☐ 2. No (→ END)
